# Supplementary material for: Supported Bimetallic AuPd Nanoparticles as Catalyst for the Solvent-Free Selective Hydrogenation of Nitroarenes
Source: Preprints.org preprint supplement (doi:10.20944/preprints201808.0095.v1), 2018-08-05
Supplement: Supplementary file 1 [file supplementary]

## Supporting information

### Supported Bimetallic AuPd Nanoparticles as Catalyst for the Solvent-Free Selective Hydrogenation of Nitroarenes

Ruiyang Qu,<sup>a,b</sup> Margherita Macino,<sup>a</sup> Sarwat Iqbal,<sup>a</sup> Xiang Gao,<sup>b\*</sup> Qian He,<sup>a</sup> Graham J. Hutchings,<sup>a</sup> Meenakshisundaram Sankar<sup>a\*</sup>

<sup>a</sup> *Cardiff Catalysis Institute, School of Chemistry, Cardiff University, Cardiff, CF10 3AT, UK*

<sup>b</sup> *State Key Laboratory of Clean Energy Utilization, College of Energy Engineering, Zhejiang University, Hangzhou, 310027, China*

*\* Corresponding author. Prof. X. Gao, State Key Laboratory of Clean Energy Utilization, College of Energy Engineering, Zhejiang University, Hangzhou, 31002, China.*

*E-mail: [xgao1@zju.edu.cn](mailto:xgao1@zju.edu.cn)*

*\* Corresponding author. Dr. M. Sankar, Cardiff Catalysis Institute, School of Chemistry, Cardiff University, Cardiff, CF10 3AT, UK*

*E-mail address: [Sankar@cardiff.ac.uk](mailto:Sankar@cardiff.ac.uk)*

This supporting information contains

Figures S1 and S2

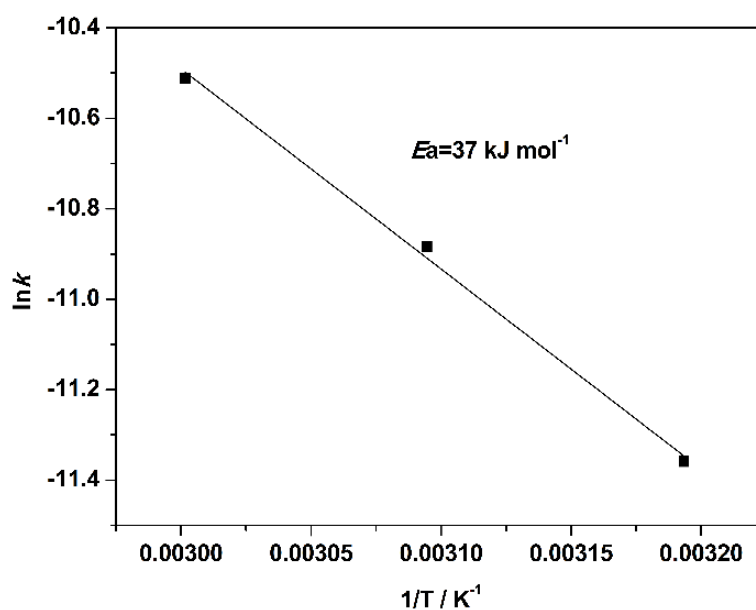

**Figure S1** Arrhenius plot for the hydrogenation of nitrobenzene over 1%AuPd/TiO<sub>2</sub> ( $M_{Im}$ ) catalyst. Reaction conditions: nitrobenzene: 10 mmol, ethanol: 16 mL, catalyst: 12.5 mg, H<sub>2</sub> pressure: 3 bar.

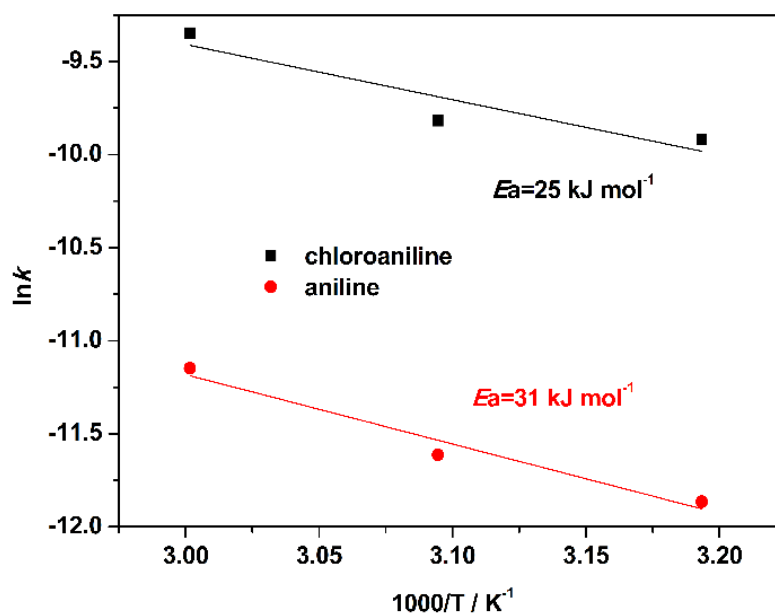

**Figure S2** Arrhenius plot for the hydrogenation of CAN over 1%AuPd/TiO<sub>2</sub> ( $M_{Im}$ ) catalyst. Reaction conditions: CAN: 10 mmol, ethanol: 16 mL, catalyst: 12.5 mg, H<sub>2</sub> pressure: 3 bar.
